# Supplementary material for: The added value of signal detection theory as a method in evidence-informed decision-making in higher education: A demonstration
Source: Frontiers journal article supplement (doi:10.3389/feduc.2022.906611), 2022-10-20
Supplement: Table_1.docx [file Table_1.docx]

**Supplementary Table 1**

Table 1

*Sociodemographic and**Educational Characteristics of Participants*

| *Characteristics* | Frequencies and descriptive statistics |
| --- | --- |
| Gender: females | n = 86; 59% |
| Age range | 20 – 28 years |
| Age | Mean = 22.2;  SD = 1.36; |
| *Prior Field of Study* |  |
| Biology | n = 142; 97.9% |
| Biomedical Sciences | n = 2; 1.4% |
| Liberal Arts and Sciences | n = 1; 0.7% |
| *Study success indicators* |  |
| Bachelor’s Thesis Grade | *M* = 7.73, *SE* = .06 |
| Bachelor’s Average Grade | *M* = 7.08, *SE* = .04 |
| Graduate Average Grade | *M = 7.76, SE = .05* |
