# Supplementary material for: The added value of signal detection theory as a method in evidence-informed decision-making in higher education: A demonstration
Source: Frontiers journal article supplement (doi:10.3389/feduc.2022.906611), 2022-10-20
Supplement: Table_2.docx [file Table_2.docx]

**Supplementary Table 2**

Table 2

*Regression Coefficients of Prior Grades on Graduate Average Grade*

| Variable | Model 1 | | |  | Model 2 | | |  |
| --- | --- | --- | --- | --- | --- | --- | --- | --- |
| *B* | *SE* | *t* | *p* | *B* | *SE* | *t* | *p* |
| Constant | 5.51 | .45 | 12.19 | <.001 | 2.52 | .61 | 4.12 | <.001 |
| Thesis Grade | .29 | .06 | 5.01 | <.001 | .09 | .06 | 1.58 | .117 |
| Bachelor’s Average Grade |  |  |  |  | .64 | .10 | 6.44 | <.001 |
| R2adj | .14 | | | <.001 | .33 | | | <.001 |
| R2change |  |  |  |  | .19 | | | <.001 |
